# Supplementary material for: Clinical Impact of Revised Ciprofloxacin Breakpoint in Patients with Urinary Tract Infections by Enterobacteriaceae
Source: MDPI journal article supplement (doi:10.3390/antibiotics10040469), 2021-04-20
Supplement: s1 [file s1]

## Supplementary Table

**Table S1. Univariate analysis of association between characteristics of patients and recurrence of urinary tract infections within 4 weeks**

| <b>Variables</b>                   | <b>HR (95% CI)</b>     | <b>P value</b> |
|------------------------------------|------------------------|----------------|
| <b>Sex, female</b>                 | 1.681 (0.210-13.444)   | 0.624          |
| <b>Age</b>                         | 1.022 (0.975-1.071)    | 0.364          |
| <b>CIP, non-susceptible</b>        | 1.564 (0.325-7.527)    | 0.577          |
| <b>ESBL producing organism</b>     | 3.313 (0.414-26.492)   | 0.259          |
| <b>Appropriate antibiotics</b>     | 0.253 (0.052-1.216)    | 0.086          |
| Ciprofloxacin                      | 1.013 (0.253-4.049)    | 0.986          |
| Ceftriaxone                        | 1.174 (0.315-4.372)    | 0.811          |
| Piperacillin/tazobactam            | 0.037 (0-69.881)       | 0.392          |
| Ertapenem                          | 0.048 (0-147694408)    | 0.786          |
| <b>Underlying disease</b>          |                        |                |
| Diabetes mellitus                  | 0.029 (0-13.296)       | 0.258          |
| Cardiovascular disease             | 0.429 (0.091-2.114)    | 0.305          |
| Respiratory disease                | 16.725 (3.471-80.589)  | <0.001         |
| Liver disease                      | 0.042 (0-361.369)      | 0.492          |
| Renal disease                      | 0.046 (0-15826.669)    | 0.635          |
| Neurologic disease                 | 2.216 (0.442-10.234)   | 0.347          |
| Connective tissue disease          | 3.447 (0.431-27.565)   | 0.243          |
| Hematologic malignancy             | 23.450 (4.854-113.291) | <0.001         |
| Solid cancer                       | 0.733 (0.092-5.858)    | 0.769          |
| Solid organ transplantation        | 1.850 (0.231-14.795)   | 0.562          |
| <b>CWI score</b>                   | 0.891 (0.589-1.348)    | 0.585          |
| <b>Pitt bacteremia score</b>       | 1.180 (0.761-1.831)    | 0.459          |
| <b>Risk factors for recurrence</b> | 0.341 (0.043-2.726)    | 0.310          |
| Previous UTIs history              | 0.040 (0-174.745)      | 0.452          |
| Foreign body insertion             | 0.047 (0-84139.179)    | 0.677          |
| Urinary stone                      | 0.047 (0-261475.275)   | 0.700          |
| Polycystic kidney disease          | 82.749 (9.249-740.347) | <0.001         |
| Urinary dysfunction                | 0.046 (0-52074.756)    | 0.666          |
| Kidney transplantation             | 0.046 (0-11346.102)    | 0.626          |

Abbreviations: CIP=Ciprofloxacin; ESBL=Extended-spectrum beta-lactamases; CWI=Charlson weighted index ; UTIs=Urinary tract infections

**Table S2. Univariate analysis of association between characteristics of patients and recurrence of urinary tract infections within 90 days**

| <b>Variables</b>                  | <b>HR (95% CI)</b>   | <b>P value</b> |
|-----------------------------------|----------------------|----------------|
| <b>Sex, female</b>                | 0.905 (0.341-2.401)  | 0.841          |
| <b>Age</b>                        | 0.981 (0.960-1.003)  | 0.085          |
| <b>CIP, non-susceptible</b>       | 0.696 (0.209-2.317)  | 0.554          |
| <b>ESBL producing organism</b>    | 2.486 (0.558-10.520) | 0.216          |
| <b>Appropriate antibiotics</b>    | 0.530 (0.159-1.764)  | 0.301          |
| Ciprofloxacin                     | 0.932 (0.405-2.143)  | 0.868          |
| Ceftriaxone                       | 0.641 (0.279-1.474)  | 0.295          |
| Piperacillin/tazobactam           | 1.154 (0.435-3.061)  | 0.773          |
| Ertapenem                         | 2.031 (0.275-14.986) | 0.487          |
| <b>Underlying disease</b>         |                      |                |
| Diabetes mellitus                 | 0.887 (0.373-2.111)  | 0.787          |
| Cardiovascular disease            | 0.362 (0.137-0.960)  | 0.041          |
| Respiratory disease               | 6.329 (1.496-26.781) | 0.012          |
| Liver disease                     | 1.057 (0.317-3.521)  | 0.928          |
| Renal disease                     | 2.390 (0.718-7.960)  | 0.156          |
| Neurologic disease                | 0.675 (0.159-2.855)  | 0.593          |
| Connective tissue disease         | 0.047 (0-756.909)    | 0.537          |
| Hematologic malignancy            | 4.101 (0.556-30.267) | 0.166          |
| Solid cancer                      | 1.303 (0.491-3.454)  | 0.595          |
| Solid organ transplantation       | 2.111 (0.634-7.031)  | 0.224          |
| <b>CWI score</b>                  | 1.041 (0.866-1.253)  | 0.668          |
| <b>Pitt bacteremia score</b>      | 0.885 (0.620-1.265)  | 0.503          |
| <b>Risk factors of recurrence</b> | 1.364 (0.820-2.270)  | 0.232          |
| Previous UTIs history             | 1.915 (0.769-4.766)  | 0.163          |
| Foreign body insertion            | 2.977 (0.894-9.915)  | 0.076          |
| Urinary stone                     | 0.995 (0.135-7.345)  | 0.996          |
| Polycystic kidney disease         | 0                    |                |
| Urinary dysfunction               | 0.845 (0.115-6.237)  | 0.869          |
| Kidney transplantation            | 2.242 (0.673-7.468)  | 0.188          |

Abbreviations: CIP=Ciprofloxacin; ESBL=Extended-spectrum beta-lactamases; CWI =Charlson weighted index ; UTIs= Urinary tract infections

**Table S3. Baseline characteristics in the subgroup of patients with *Enterobacteriaceae*. bacteremic urinary tract infections treated with ciprofloxacin as an empirical as well as a definite treatment**

| Variables                                | CIP-Susceptible<br>MIC≤0.25<br>(n=93) | CIP non-susceptible<br>MIC=0.5 or 1<br>(n=18) | P value |
|------------------------------------------|---------------------------------------|-----------------------------------------------|---------|
| <b>Sex , female</b>                      | 82 (88.2)                             | 18 (100)                                      | 0.124   |
| <b>Age (years)</b>                       | 67 (48.75-77.5)                       | 64 (55-75)                                    | 0.919   |
| <b>Patients with<br/>any comorbidity</b> |                                       |                                               |         |
| Diabetes mellitus                        | 22 (23.7)                             | 4 (22.2)                                      | 0.895   |
| Cardiovascular disease                   | 22 (23.7)                             | 4 (22.2)                                      | 0.895   |
| Respiratory disease                      | 1 (1.1)                               | 0 (0)                                         | 1.000   |
| Liver disease                            | 6 (6.5)                               | 4 (22.2)                                      | 0.055   |
| Renal disease                            | 1 (1.1)                               | 2 (11.1)                                      | 0.068   |
| Neurologic disease                       | 9 (9.7)                               | 1 (5.6)                                       | 0.576   |
| Solid cancer                             | 5 (5.4)                               | 2 (11.1)                                      | 0.360   |
| Connective<br>tissue disease             | 5 (5.4)                               | 1 (5.6)                                       | 0.975   |
| Hematologic disease                      | 0 (0)                                 | 1 (5.6)                                       | 0.162   |
| Solid organ transplantation              | 1 (1.1)                               | 2 (11.1)                                      | 0.068   |
| <b>CWI score</b>                         | 1 (0-2)                               | 0 (0-1)                                       | 0.167   |
| <b>Pitt bacteremia score</b>             | 0 (0-1)                               | 1 (0-2)                                       | 0.073   |
| <b>Identified pathogen</b>               |                                       |                                               |         |
| <i>Escherichia coli</i>                  | 87 (93.5)                             | 14 (77.8)                                     | 0.032   |
| <i>Klebsiella pneumoniae</i>             | 6 (6.5)                               | 4 (22.2)                                      | 0.032   |
| ESBL<br>producing organism               | 4 (4.3)                               | 0 (0)                                         | 0.610   |
| <b>Treatment duration</b>                | 12 (8.5-15)                           | 11 (9-13.25)                                  | 0.380   |
| <b>Follow up duration</b>                | 98 (54-127)                           | 93 (14-136)                                   | 0.632   |
| <b>Risk factors for recurrence</b>       | 17 (18.3)                             | 4 (22.2)                                      | 0.696   |
| Previous UTIs history                    | 7 (7.5)                               | 2 (11.1)                                      | 0.610   |
| Foreign body insertion                   | 3 (3.2)                               | 0 (0)                                         | 0.585   |
| Urinary stone                            | 2 (2.2)                               | 0 (0)                                         | 0.701   |
| Urinary dysfunction                      | 5 (5.4)                               | 1 (5.6)                                       | 0.975   |
| Polycystic kidney disease                | 1 (1.1)                               | 0 (0)                                         | 0.838   |

|                        |         |          |       |
|------------------------|---------|----------|-------|
| Kidney transplantation | 1 (1.1) | 2 (11.1) | 0.068 |
|------------------------|---------|----------|-------|

---

Data are expressed as number (%) of patients or median (IQR)

Abbreviations: CIP=Ciprofloxacin; MIC=Minimum Inhibitory Concetration; CWI = Charlson weighted index; ESBL= Extended-spectrum beta-lactamases ; UTIs=Urinary tract infections

**Table S4. Comparison of clinical outcomes in the subgroup of patients with *Enterobacteriaceae*. bacteremic urinary tract infections treated with ciprofloxacin as an empirical as well as a definite treatment**

| Variables                             | CIP-Susceptible<br>MIC≤0.25<br>(n=93) | CIP non-susceptible<br>MIC=0.5 or 1<br>(n=18) | P value |
|---------------------------------------|---------------------------------------|-----------------------------------------------|---------|
| Length of hospital days               | 5 (0-7)                               | 4 (0-6)                                       | 0.646   |
| Recurrence within 4 weeks             | 2 (2.2)                               | 1 (5.6)                                       | 0.415   |
| Recurrence within 90 days             | 7 (7.5)                               | 1 (5.6)                                       | 0.767   |
| All-cause mortality                   | 1 (1.1)                               | 0 (0)                                         | 0.838   |
| Prolonged bacteremia more than 1 week | 0 (0)                                 | 0 (0)                                         | 1       |
| Time to defervescence                 | 2 (1-2.25)                            | 2 (1-3)                                       | 0.223   |

Data are expressed as number (%) of patients or median (IQR)

**Table S5. Univariate and multivariate analysis of association between characteristics of patients and recurrence of urinary tract infections within 4 weeks on patients treated with ciprofloxacin as an empirical as well as a definite treatment**

| Variables                          | Univariate           |         | Multivariate         |         |
|------------------------------------|----------------------|---------|----------------------|---------|
|                                    | HR (95% CI)          | P value | HR (95% CI)          | P value |
| <b>Sex, female</b>                 | 0.215 (0.019-2.368)  | 0.209   | 0.085 (0.003-2.070)  | 0.130   |
| <b>Age</b>                         | 1.045 (0.952-1.146)  | 0.353   | 1.031 (0.938-1.133)  | 0.529   |
| <b>CIP, non-susceptible</b>        | 2.674 (0.242-29.491) | 0.422   | 3.290 (0.190-57.010) | 0.413   |
| <b>ESBL producing organism</b>     | 0.047 (0-2.254E+10)  | 0.824   | 0                    | 0.994   |
| <b>CWI score</b>                   | 1.255 (0.766-2.056)  | 0.367   | 1.110 (0.596-2.068)  | 0.742   |
| <b>Pitt bacteremia score</b>       | 0.415 (0.064-2.672)  | 0.355   | 0.353 (0.046-2.697)  | 0.316   |
| <b>Risk factors for recurrence</b> | 3.276 (0.610-17.583) | 0.166   | 3.306 (0.462-23.682) | 0.234   |

Abbreviations: CIP=Ciprofloxacin; ESBL= Extended-spectrum beta-lactamases; CWI = Charlson weighted index ;

**Table S6. Univariate and Multivariate analysis of association between characteristics of patients and recurrence of urinary tract infections within 90 days on patients treated with ciprofloxacin as an empirical as well as a definite treatment**

| Variables                          | Univariate            |         | Multivariate           |         |
|------------------------------------|-----------------------|---------|------------------------|---------|
|                                    | HR (95% CI)           | P value | HR (95% CI)            | P value |
| <b>Sex, female</b>                 | 0.297 (0.060-1.470)   | 0.137   | 0.495 (0.045-5.444)    | 0.565   |
| <b>Age</b>                         | 0.976 (0.942-1.012)   | 0.190   | 0.926 (0.862-0.994)    | 0.033   |
| <b>CIP, non-susceptible</b>        | 0.750 (0.092-6.096)   | 0.788   | 0.945 (0.092-9.682)    | 0.962   |
| <b>ESBL producing organism</b>     | 0.048 (0-3437938.621) | 0.741   | 0                      | 0.991   |
| <b>CWI score</b>                   | 0.891 (0.496-1.601)   | 0.700   | 1.356 (0.771-2.386)    | 0.291   |
| <b>Pitt bacteremia score</b>       | 0.904 (0.469-1.740)   | 0.762   | 0.746 (0.329-1.689)    | 0.482   |
| <b>Risk factors for recurrence</b> | 4.920 (1.904-12.714)  | 0.001   | 10.786 (0.998-116.517) | 0.050   |

Abbreviations: CIP=Ciprofloxacin; ESBL= Extended-spectrum beta-lactamases; CWI = Charlson weighted index ;
